# Supplementary material for: Fecal Proteome Profile in Dogs Suffering from Different Hepatobiliary Disorders and Comparison with Controls
Source: MDPI journal article supplement (doi:10.3390/ani13142343), 2023-07-18
Supplement: s1 [file s1]

| #category          | term ID    | term description                       | observed gene count | background gene count | strength | FDR      | Matching proteins (labels)                                                                                             |
|--------------------|------------|----------------------------------------|---------------------|-----------------------|----------|----------|------------------------------------------------------------------------------------------------------------------------|
| <b>DHD vs HD:</b>  |            |                                        |                     |                       |          |          |                                                                                                                        |
| GO Component       | GO:0005576 | Extracellular region                   | 16                  | 2155                  | 0.67     | 4.94e-05 | DLA88,CLPS,PRSS1,CTSC,ENSCAFP00000009968,ANPEP,CTSS,NAXE,GP2,OBP2B,CELA1,ANXA2,DNASE1,TFF2,CANF2,FN1                   |
| <b>CHD vs HD:</b>  |            |                                        |                     |                       |          |          |                                                                                                                        |
| GO Component       | GO:0005576 | Extracellular region                   | 14                  | 2155                  | 0.67     | 0.00036  | DLA88,PRSS1,CTSC,SOD1,LYZF2,CTSS,GP2,HP,CELA1,ANXA2,NPC2,DNASE1,TFF2,FN1                                               |
| GO Component       | GO:0005615 | Extracellular space                    | 11                  | 1274                  | 0.79     | 0.00039  | DLA88,PRSS1,CTSC,SOD1,LYZF2,CTSS,GP2,HP,CELA1,ANXA2,TFF2                                                               |
| KEGG               | cfa04142   | Lysosome                               | 4                   | 155                   | 1.27     | 0.0155   | CTSC,CTSS,FUCA1,NPC2                                                                                                   |
| KEGG               | cfa04210   | Apoptosis                              | 4                   | 140                   | 1.31     | 0.0155   | CYCS,CTSC,CTSS,ACTB                                                                                                    |
| KEGG               | cfa05416   | Viral myocarditis                      | 3                   | 79                    | 1.44     | 0.0228   | DLA88,CYCS,ACTG1                                                                                                       |
| KEGG               | cfa05100   | Bacterial invasion of epithelial cells | 3                   | 100                   | 1.34     | 0.0335   | ACTB,CDH1,FN1                                                                                                          |
| <b>CHD vs DHD:</b> |            |                                        |                     |                       |          |          |                                                                                                                        |
| GO Component       | GO:0005576 | Extracellular region                   | 17                  | 2155                  | 0.74     | 6.96e-07 | DLA88,PRSS1,CTSC,ENSCAFP00000009968,SOD1,CBLIF,ANPEP,HP,OBP2B,CELA1,LYZ,ANXA2,DNASE1,ENSCAFP00000057458,TFF2,CANF2,FN1 |
| GO Component       | GO:0005615 | Extracellular space                    | 11                  | 1274                  | 0.78     | 0.00059  | DLA88,PRSS1,CTSC,SOD1,CBLIF,ANPEP,HP,CELA1,LYZ,ANXA2,TFF2                                                              |
| GO Component       | GO:0005833 | Hemoglobin complex                     | 2                   | 5                     | 2.44     | 0.0209   | HBA,HBB                                                                                                                |
| GO Component       | GO:0031838 | Haptoglobin-hemoglobin complex         | 2                   | 5                     | 2.44     | 0.0209   | HBA,HBB                                                                                                                |
| KEGG               | cfa05143   | African trypanosomiasis                | 3                   | 56                    | 1.57     | 0.0286   | HP,HBA,HBB                                                                                                             |

**Supplementary Table S4.** Functional enrichment analysis. Enriched GO component terms and KEGG pathways obtained by String analysis. The table reports the term IDs and description, the observed gene count (which reflects the number of the identified proteins belonging to the enriched GO term/KEGG pathway), the background gene count (i.e. total number of genes related to the indicated GO term/KEGG pathway), the strength and FDR which indicate the statistical significance of the enrichment, and the name of matching proteins.
